# Supplementary material for: DNA methylation signature in peripheral blood reveals distinct characteristics of human X chromosome numerical aberrations
Source: PubMed Central journal article supplement (PMC4517491; doi:10.1186/s13148-015-0112-2), 2015-07-28

# Overlap between differentially methylated CpGs and age sensitive DMRs (Autosomes only)

## Bell et al, Plos Genetics, 2012

Illumina 27K data: 490 CpGs  
Blood samples  
172 female twins  
32-80 years old

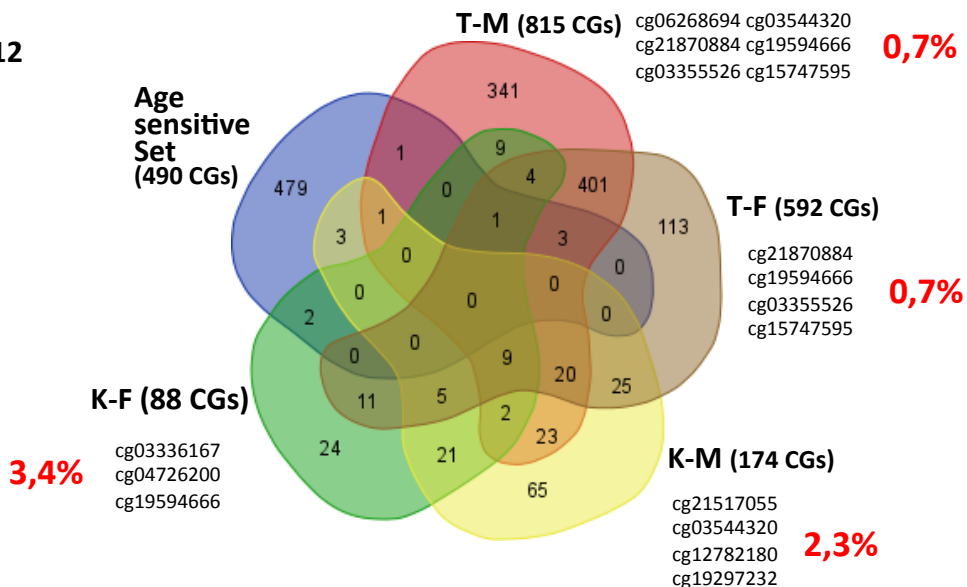

## Rakyan et al, Genome research, 2010

Illumina 27K data: 131 CpGs  
Blood samples and CD4+, CD14+  
93 females  
49-75 years old

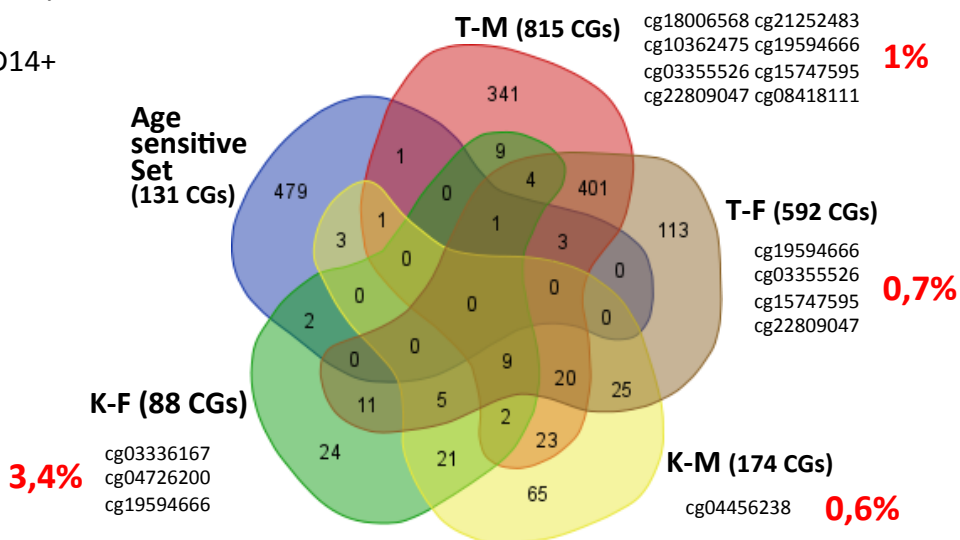

## Weidner et al, Genome Biology, 2014

Illumina 27K data: 102 CpGs  
Blood samples  
0-73 years

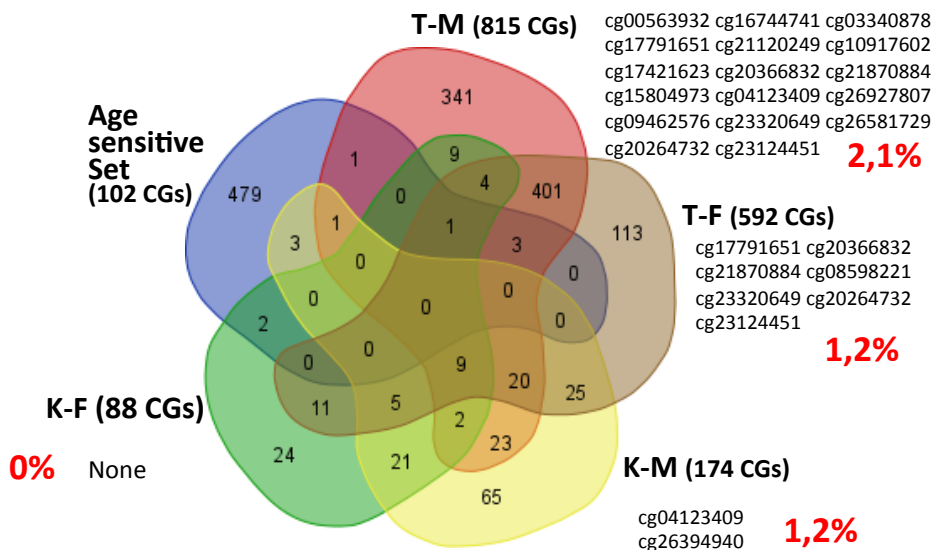

Supplement: 13148_2015_112_MOESM2_ESM.pdf [file 13148_2015_112_MOESM2_ESM.pdf]
