# Supplementary material for: DNA methylation signature in peripheral blood reveals distinct characteristics of human X chromosome numerical aberrations
Source: PubMed Central journal article supplement (PMC4517491; doi:10.1186/s13148-015-0112-2), 2015-07-28
Supplement: 13148_2015_112_MOESM7_ESM.pdf [file 13148_2015_112_MOESM7_ESM.pdf]

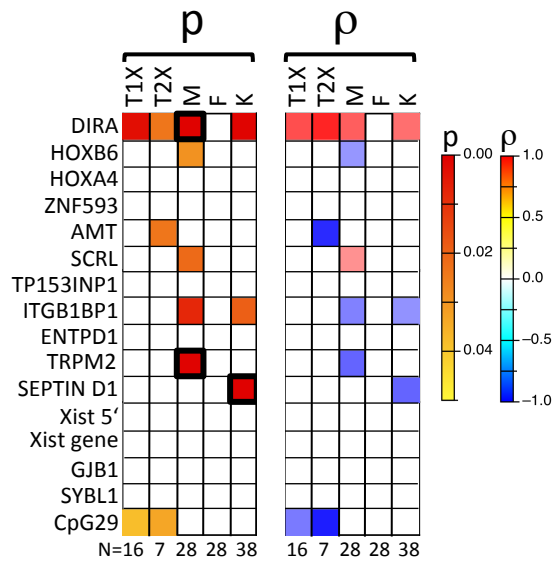

☐ Significance after correction for multiple testing using a Bonferroni threshold of  $p < 0.000625$  ( $0.05/80$ )
