# Supplementary material for: DNA methylation signature in peripheral blood reveals distinct characteristics of human X chromosome numerical aberrations
Source: PubMed Central journal article supplement (PMC4517491; doi:10.1186/s13148-015-0112-2), 2015-07-28

**A)****Turner 45,X (n=16)**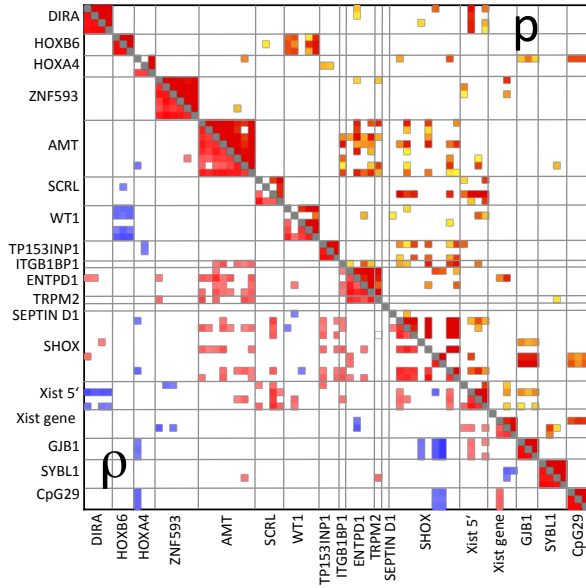**Klinefelter 47,XXY (n=38)**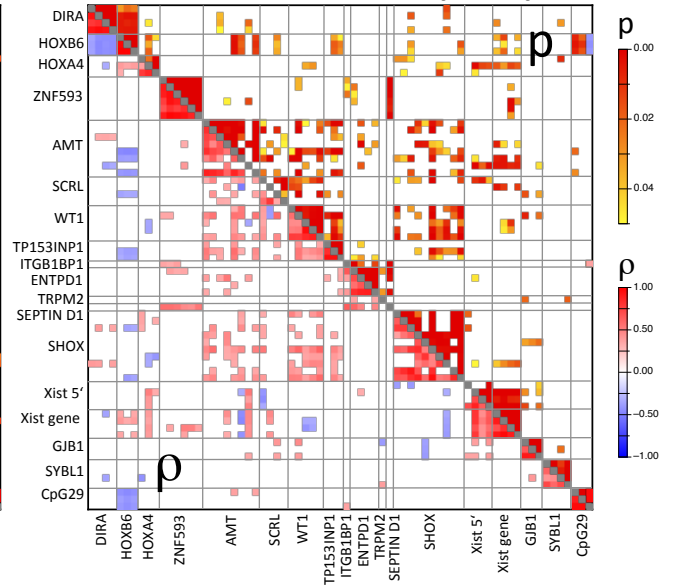**Male 46,XY (n=28)**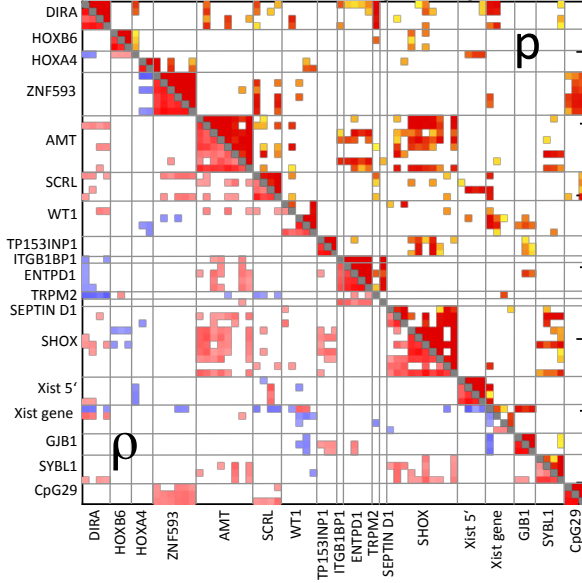**Female 46,XX (n=28)**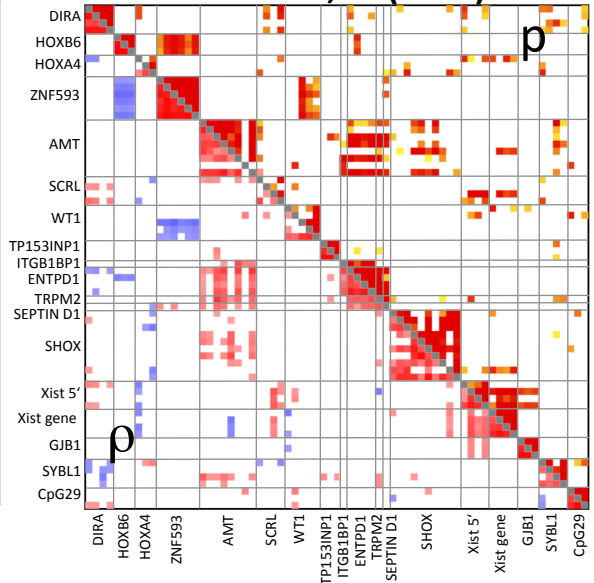

**B)**

**Turner 45,X (n=16)**

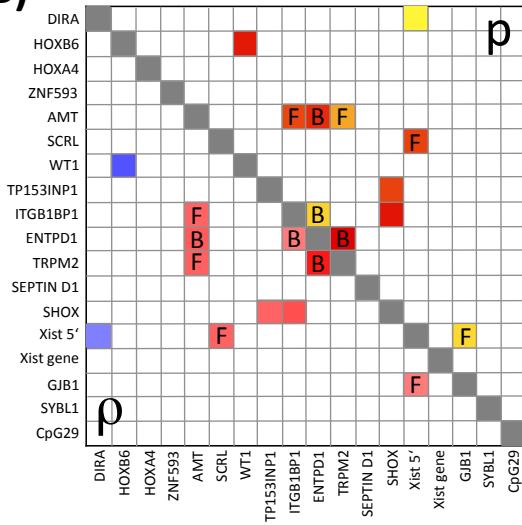

**Klinefelter 47,XXY (n=38)**

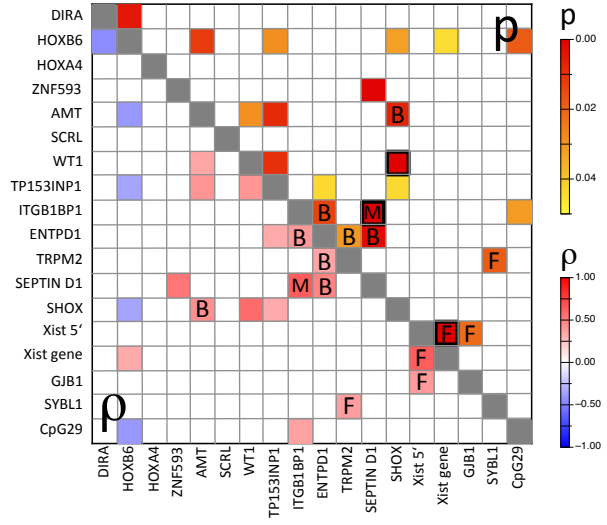

**Male 46,XY (n=28)**

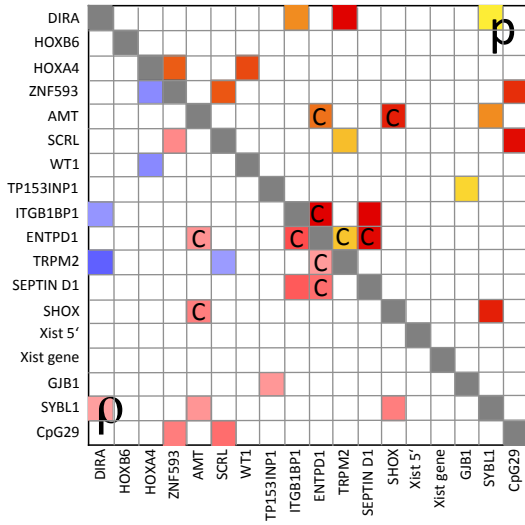

**Female 46,XX (n=28)**

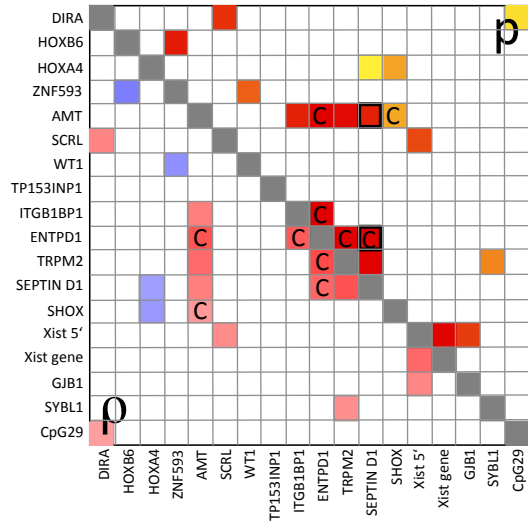

Supplement: 13148_2015_112_MOESM9_ESM.pdf [file 13148_2015_112_MOESM9_ESM.pdf]
